# Supplementary material for: Anionically modified N-(alkyl)acrylamide-based semi-IPN hybrid gels reinforced with SiO2 for enhanced on–off switching and responsive properties
Source: Royal Society of Chemistry journal article supplement (doi:10.1039/d2sm00319h), 2022-01-01
Supplement: d2sm00319h1.pdf [file d2sm00319h1.pdf]

## Supplementary Material

### **Anionically modified N-(alkyl)acrylamide-based semi-IPN hybrid gels reinforced with SiO<sub>2</sub> for enhanced on-off switching and responsive properties**

**Birgul KALKAN and Nermin ORAKDOGEN**

Istanbul Technical University, Department of Chemistry, Soft Materials Research Laboratory, 34469, Maslak, Istanbul, Turkey, Tel: +90-212-285-3305

\*Corresponding author; e-mail: orakdogen@itu.edu.tr

#### **ATR-FTIR spectra of semi-IPN hybrid gels**

The spectrum of raw SiO<sub>2</sub> showed a broad band with a maximum at 3422 cm<sup>-1</sup> indicated the water contribution (–OH). The peak at 3750 cm<sup>-1</sup> was assigned to isolated silanols vibrations. The absorption peak at 1646 cm<sup>-1</sup> was attributed to adsorbed water molecules deformation vibration, while C–H stretching vibration appeared at 2881 cm<sup>-1</sup>. The discrete sharp band at 841 cm<sup>-1</sup> was ascribed to O–H bending mode of hydrogen bonded, while Si-O in-plane stretching vibrations of silanol Si-OH groups were observed at 968 cm<sup>-1</sup>. The symmetric mode of Si–O–Si band was detected at 785 cm<sup>-1</sup>. The sharp band appearing at 1093-1059 cm<sup>-1</sup> and the shoulder at around 1150 cm<sup>-1</sup> were attributed to the transversal optical and longitudinal optical modes of Si-O-Si asymmetric stretching vibrations, respectively.

In ATR-FTIR spectra of semi-IPN P(NIPA-MA)/PAAm/SiP hybrid gels, the broad band between 3600 and 3000 cm<sup>-1</sup> with a maximum at 3276 cm<sup>-1</sup> contributed to N-H stretching vibrations and O-H stretching vibrations of carboxyl (COOH) groups from methacrylic acid, bound water in the structure and silanol (Si-OH) groups on the surface of the silica particles. The existence of intramolecular hydrogen bondings between C=O groups, N-H groups, and O-H groups on the silica surface results in a broad band between 3600 and 3000 cm<sup>-1</sup>. Asymmetric deformation vibrations of C-H bond of methyl was detected at 1458 cm<sup>-1</sup>, while the bands at 1386 and 1368 cm<sup>-1</sup> were attributed to dimethyl symmetric deformation vibration (bending) of isopropyl group, -CH(CH<sub>3</sub>)<sub>2</sub> of NIPA. C-N stretching (amide III) band at 1263 cm<sup>-1</sup> in P(NIPA-MA)/PAAm spectrum is overlapped with Si-O-Si stretching band in the spectrum of hybrid samples. The peaks at 961 and 793 cm<sup>-1</sup> are associated with Si-OH symmetric stretching and Si-O-Si bending vibrations, respectively. With the increase of SiO<sub>2</sub> content, the intensity of Si-O-Si stretching bands gradually increases in the hybrid samples, the intensities of peaks of functional groups associated with the network structure are weakened.

**Table S1.** Characteristic Functional Group Assignments

| Characteristic Functional Group Assignments | Wavelength from literature (cm <sup>-1</sup> )                           | Peak Appearance Wavelength (cm <sup>-1</sup> ) |
|---------------------------------------------|--------------------------------------------------------------------------|------------------------------------------------|
| N-H stretching                              | 3300 [1], 3200 [2]<br>3428 - 3300 [3]                                    | 3285                                           |
| Overtone of N-H bend                        |                                                                          | 3076                                           |
| C-H stretching                              | 2974 (asym) [4]<br>2944 - 2641 [5]<br>2950 - 2870 [6]<br>2900 - 3000 [7] | 2971<br>2936<br>2867                           |
| C=O stretching (amide I)                    | 1649 [8], 1630 [9]<br>1650 [10]                                          | 1633                                           |
| N-H bending (amide II)                      | 1548 [a8], 1543 [10],<br>1544 [11]                                       | 1538                                           |
| C-H bending                                 | 1456[8]                                                                  | 1458                                           |
| C-H bending (isopropyl group)               | 1386 - 1367 [8]<br>1388 - 1368 [11]                                      | 1386-1368                                      |
| Si-O-Si symmetric stretching                | 1091 [4,5], 1058 [9]                                                     | 1056                                           |
| Si-OH symmetric stretching                  | 961 [4], 964 [5], 960 [9]                                                | 961                                            |
| Si-O-Si bending                             | 799 [4], 801 [5], 798 [9]                                                | 793                                            |

**XRD results of semi-IPN hybrid gels**

XRD patterns of neat SiO<sub>2</sub>, silica-free semi-IPN P(NIPA-MA)/PAAm gel and semi-IPN hybrid P(NIPA-MA)/PAAm/SiP8-9 Hgel and Cgel samples containing 4.80 and 5.40% (w/v) of SiO<sub>2</sub>, respectively, were investigated. In the diffractogram of neat SiO<sub>2</sub>, the broad peak at  $2\theta = 22.1^\circ$  is the characteristic peak of amorphous silica particles. With addition of SiO<sub>2</sub>, all samples showed an amorphous XRD halo. Silica-free semi-IPN P(NIPA-MA)/PAAm gel showed a sharp peak at  $2\theta = 7.35^\circ$  and a broad peak at  $2\theta = 20.6^\circ$  as an indication of a trend in the polymer chain to be organized. For semi-IPN hybrid Hgel and Cgel samples, the peak observed at  $2\theta = 20.6^\circ$  shifted to higher degree with the incorporation of silica into P(NIPA-MA)/PAAm structure, while the peak observed at  $7.35^\circ$  disappeared completely due to the high percentage of silica.

## Temperature dependent swelling behavior of semi-IPN hybrid gels

**Figure S1** shows the equilibrium volume swelling ratio  $\phi_V$  of semi-IPN hybrid P(NIPA-MA)/PAAm/SiP Hgel and Cgel as a function of the external temperature and SiO<sub>2</sub> content. Photographs of P(NIPA-MA)/PAAm/SiP Hgels after swelling at 16 °C (left) and 70 °C (right) were presented.

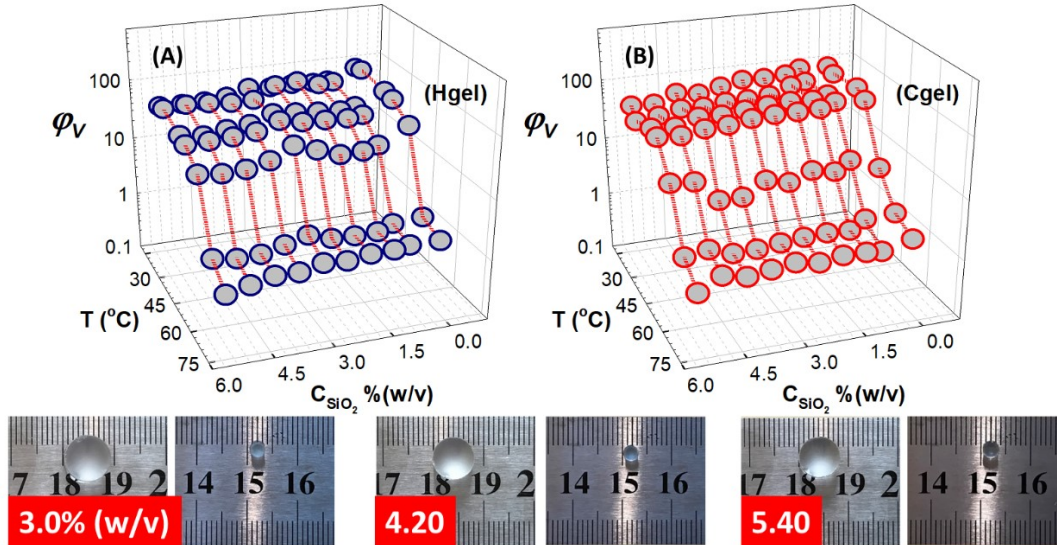

**Figure S1.** Equilibrium volume swelling ratio  $\phi_V$  of semi-IPN hybrid P(NIPA-MA)/PAAm/SiP Hgel (A) and Cgel (B) shown as a function of the external temperature and SiO<sub>2</sub> content. Photographs of P(NIPA-MA)/PAAm/SiP Hgels after swelling at 16 °C (left) and 70 °C (right).

## Salt-triggered swelling kinetics of semi-IPN hybrid gels

Figure S2 shows the plots of  $\ln \phi(t) / \phi_w$  vs  $\ln t$  (A), water fraction  $\phi(t) / \phi_w$  against  $t^{1/2}$  (B) and  $\ln(1 - \phi(t) / \phi_w)$  vs  $t$  curves (C) of semi-IPN hybrid P(NIPA-MA)/PAAm/SiP Hgel obtained from the swelling in  $10^{-5}$  M in aqueous NaCl solution. The values of the swelling exponents were obtained from the double logarithmic plot drawn between  $\ln \phi(t) / \phi_w$  vs  $\ln t$  in Figure S2(A). From the slopes of the plot between  $\phi(t) / \phi_w$  vs.  $t^{1/2}$  given in Fig.S1(B), the values of early time diffusion coefficients  $D_E$  were calculated. As the silica content in the hybrid networks was increased, the diffusion coefficients decreased. For semi-IPN hybrid P(NIPA-MA)/PAAm/SiP Hgel ranged from  $1.454 \times 10^{-7}$  to  $3.809 \times 10^{-7}$  cm<sup>2</sup> s<sup>-1</sup>. By the late-time approximation, the slope of  $\ln(1 - \phi(t) / \phi_w)$  vs  $t$  curves of semi-IPN hybrid gels in Fig. S2(C) obtained from the swelling in  $10^{-5}$  M in aqueous NaCl solution was used to determine the late-time diffusion coefficients,  $D_L$ . The early-time diffusion coefficients were lower than the late-time values due to the greater extent of the swelling in longer swelling times.

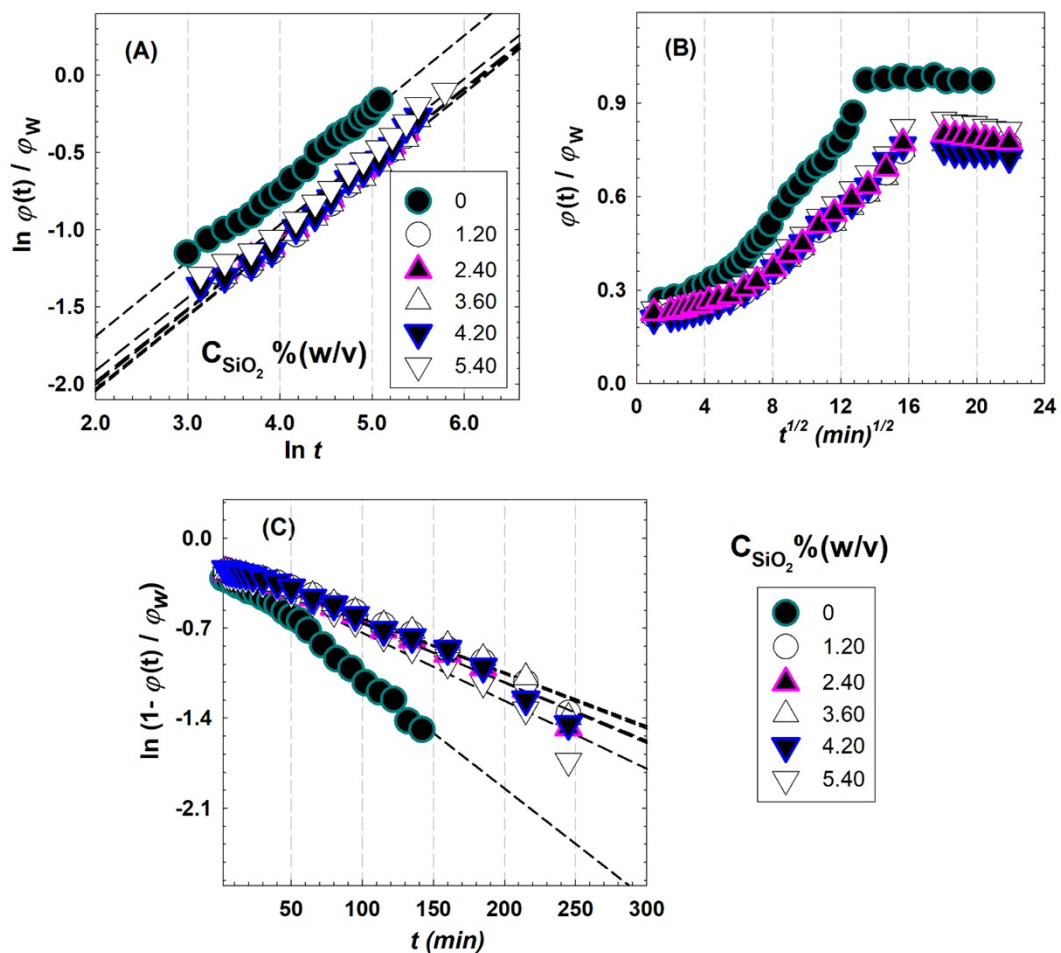

**Figure S2.** (A)  $\ln \varphi(t) / \varphi_w$  vs  $\ln t$ , (B) water fraction  $\varphi(t) / \varphi_w$  against  $t^{1/2}$  and (C)  $\ln(1 - \varphi(t) / \varphi_w)$  vs  $t$  curves of semi-IPN hybrid P(NIPA-MA)/PAAm/SiP Hgel obtained from the swelling in  $10^{-5}$  M in aqueous NaCl solution.

### Adsorbent characteristics of semi-IPN hybrid gels

The adsorption performance of the semi-IPN hybrids was tested for MV dye concentration 5 and 10 mg/L. Figure S3 shows the results for adsorption of MV dye by semi-IPN hybrid P(NIPA-MA)/PAAm/SiP gels prepared at different SiO<sub>2</sub> content as a function of contact time.

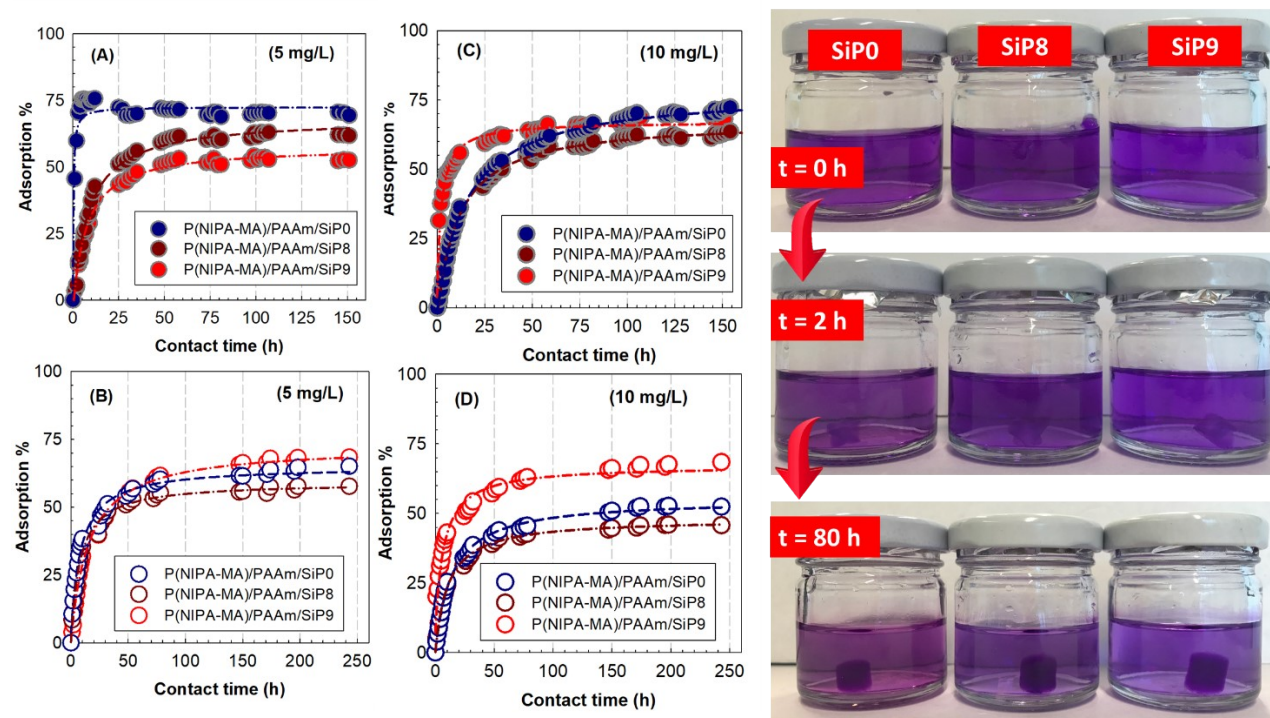

**Figure S3.** Adsorption of MV dye by semi-IPN hybrid P(NIPA-MA)/PAAm/SiP Hgel (A, C) and Cgel (B, D) prepared at different SiO<sub>2</sub> content as a function of contact time. MV dye concentration: 5 (left plots) and 10 mg/L (right plots).

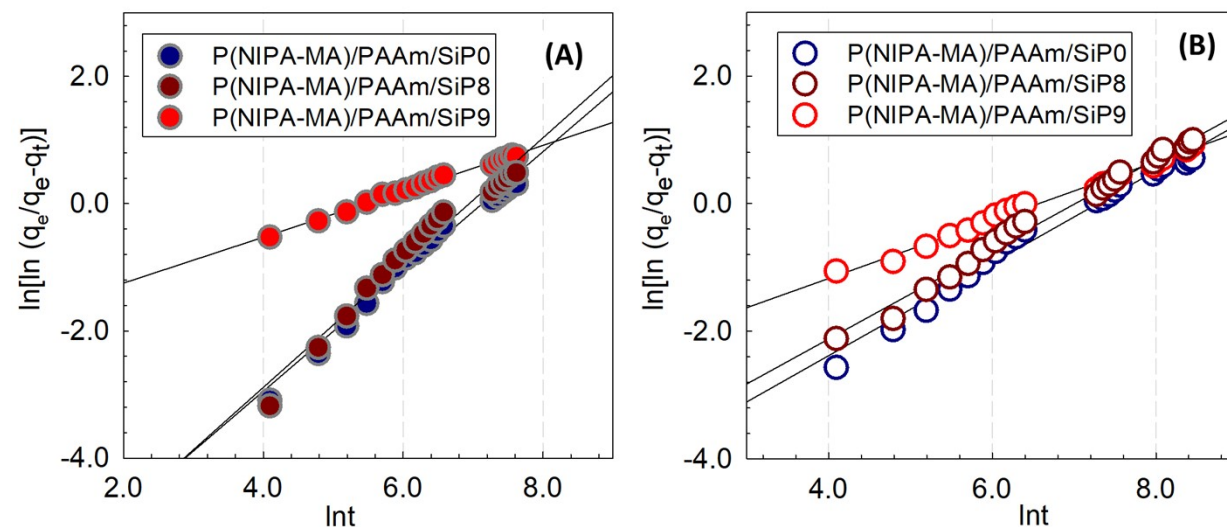

**Figure S4.** Dye adsorption kinetics fitted with Avrami kinetic model (A, B) for semi-IPN hybrid P(NIPA-MA)/PAAm/SiP Hgel (left) and Cgel (right). The solid line indicates the model-fit in the experimental data. MV concentration: 10 mg/L.

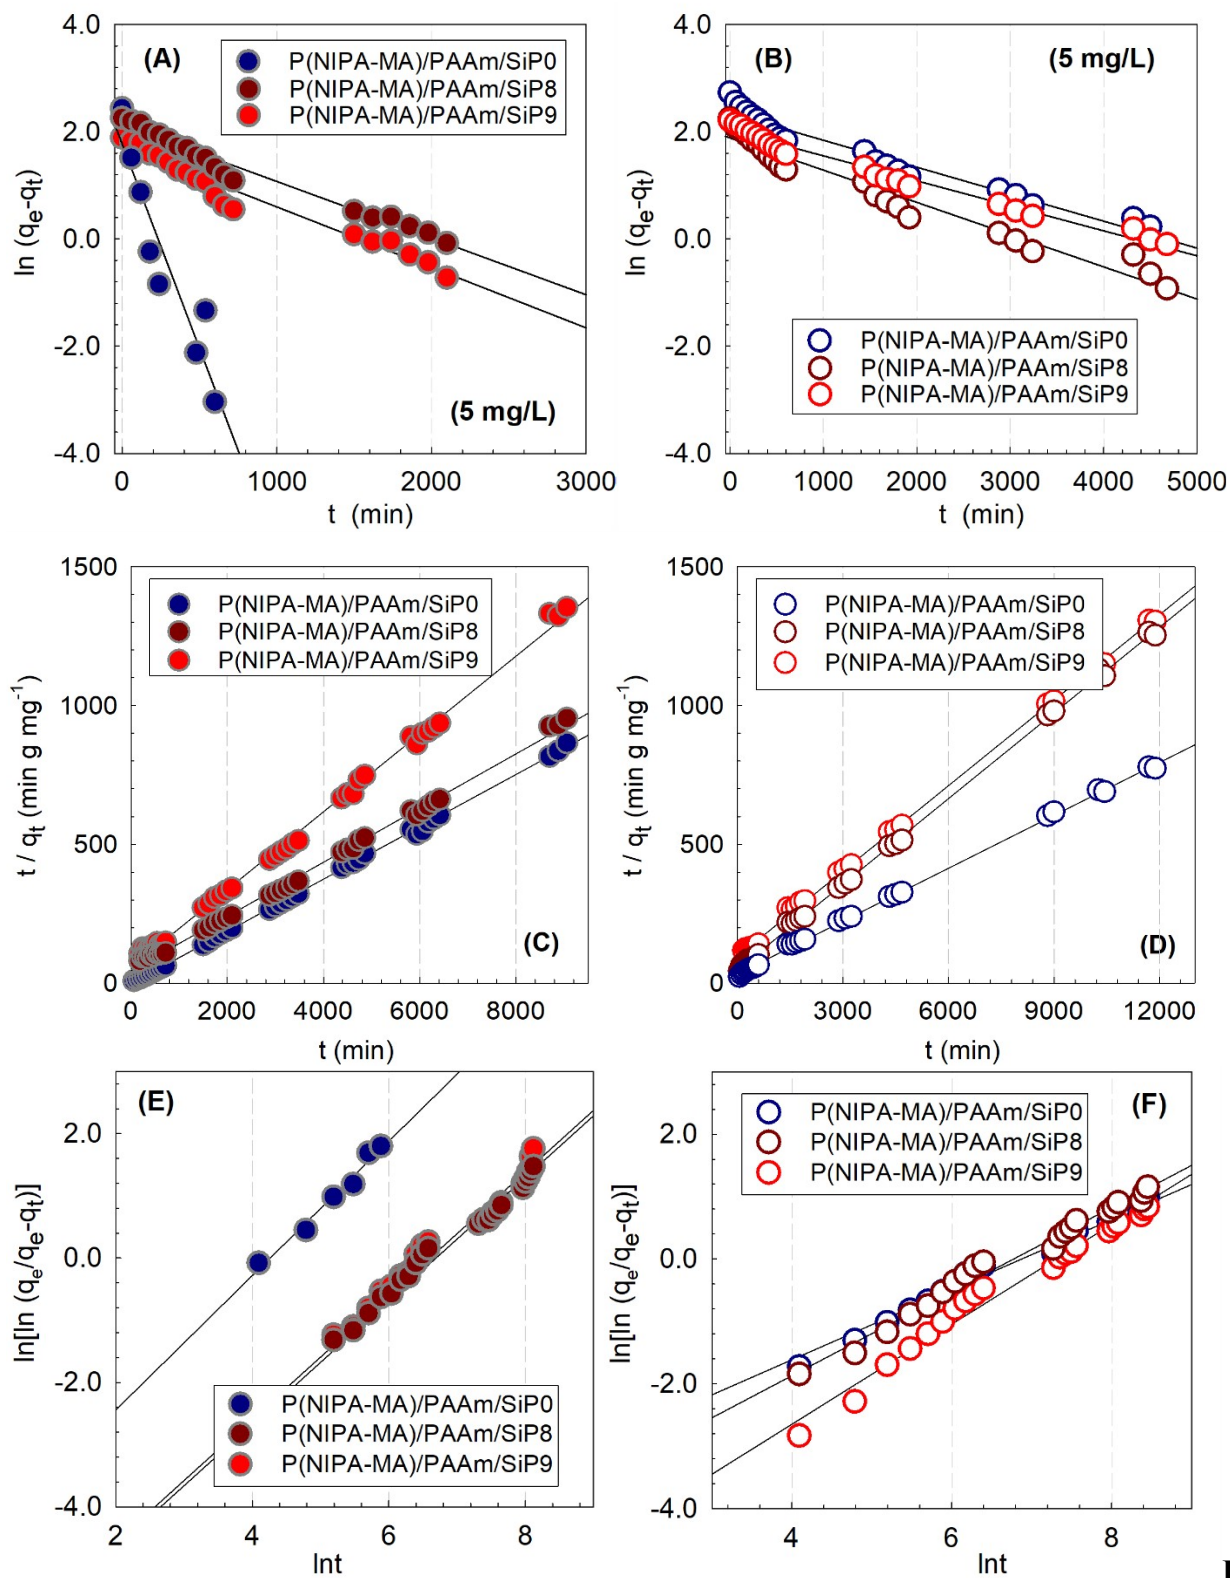

**Figure S5.** Dye adsorption kinetics fitted with Lagergren pseudo-first order kinetic model (A, B), Ho second order kinetic model (C, D), and Avrami kinetic model (E, F) for semi-IPN hybrid

P(NIPA-MA)/PAAm/SiP Hgel (left) and Cgel (right). The solid line indicates the model-fit in the experimental data. MV concentration: 5 mg/L.

Figure S5-S7 are the results of adsorption kinetics models toward the experiments. Figure S5 presents dye adsorption kinetics fitted with Lagergren pseudo-first order kinetic model (A,B), Ho second order kinetic model (C,D), and Avrami kinetic model (E,F) for semi-IPN hybrid P(NIPA-MA)/PAAm/SiP Hgel (left) and Cgel (right) in initial MV concentration of 5 mg/L. The results for dye adsorption kinetics fitted with Elovich kinetic model (A,B), and fractional power kinetic model (C,D) are presented in Figure S6 and S7 in initial MV concentration of 5 mg/L and 10 mg/L, respectively. Kinetic parameters of pseudo-first-order, pseudo-second-order, Avrami, Elovich, fractional power and intraparticle diffusion models for total MV sorption onto semi-IPN P(NIPA-MA)/PAAm/SiP Cgels for initial MV concentration 5 mg L<sup>-1</sup> are presented in Table S2. Thermodynamic parameters for adsorption of MV dye and adsorption capacity of P(NIPA-MA)/PAAm/SiP Cgel calculated from various kinetic models are shown in Table S3.

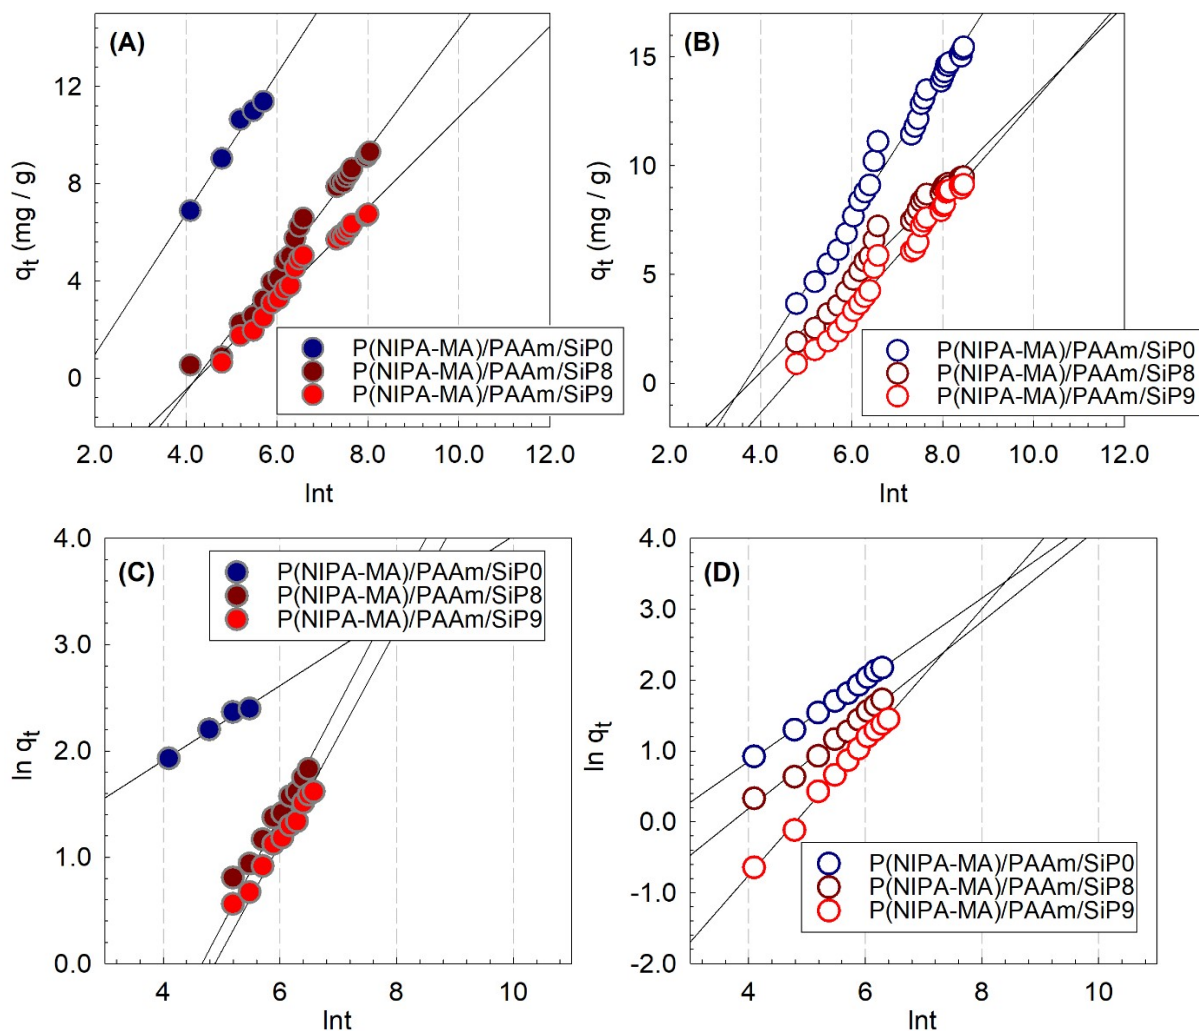

**Figure S6.** Dye adsorption kinetics fitted with Elovich kinetic model (A,B), and fractional power kinetic model (C,D) for semi-IPN hybrid P(NIPA-MA)/PAAm/SiP Hgel (left) and Cgel (right). The solid line indicates the model-fit in the experimental data. MV concentration: 5 mg/L

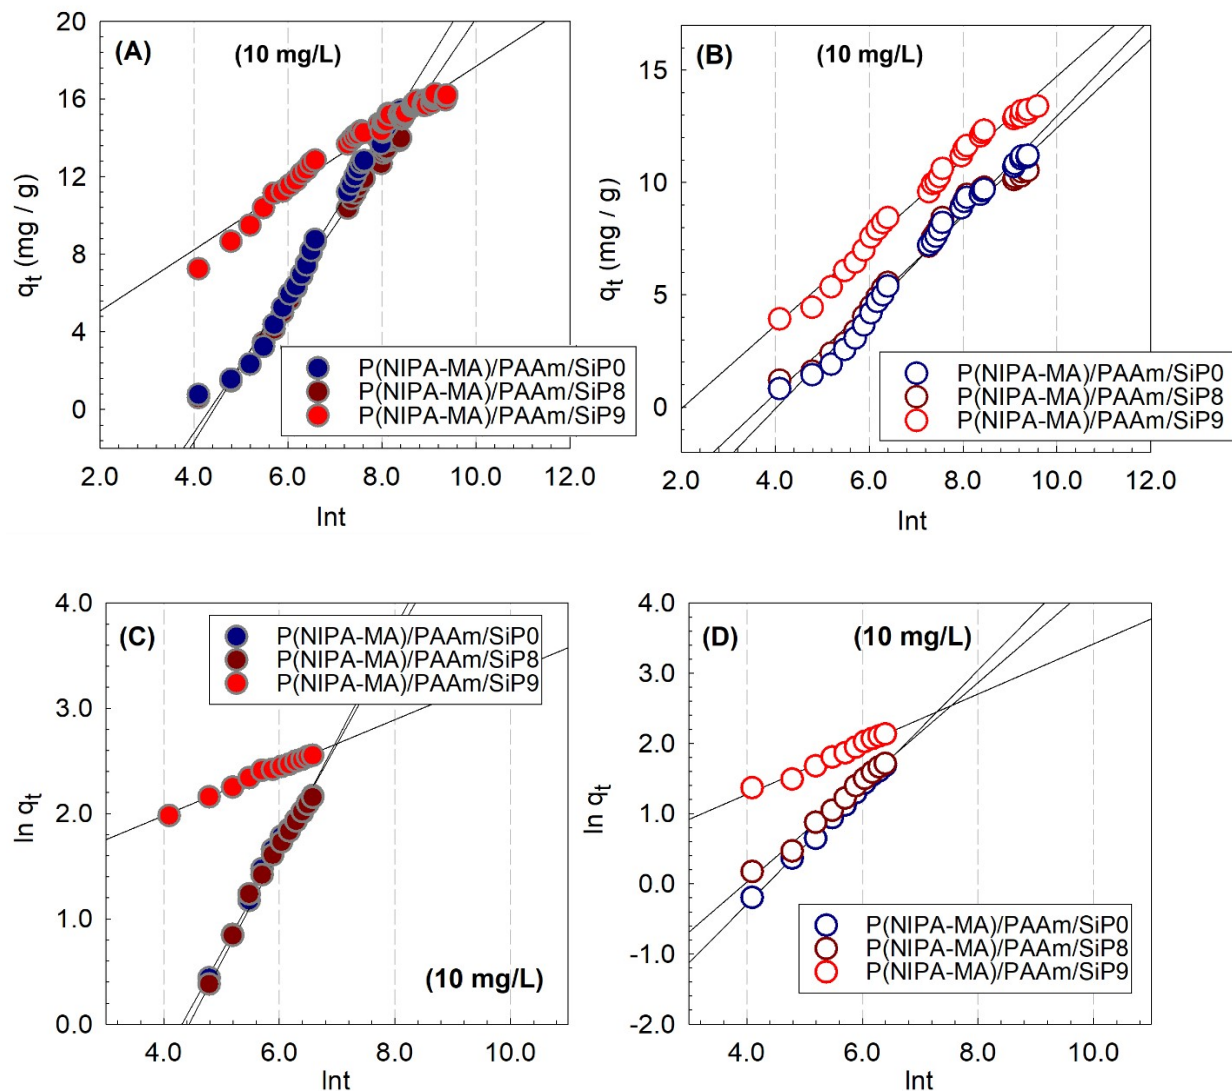

**Figure S7.** Dye adsorption kinetics fitted with Elovich kinetic model (A,B), and fractional power kinetic model (C,D) for semi-IPN hybrid P(NIPA-MA)/PAAm/SiP Hgel (left) and Cgel (right). The solid line indicates the model-fit in the experimental data. MV concentration: 10 mg/L



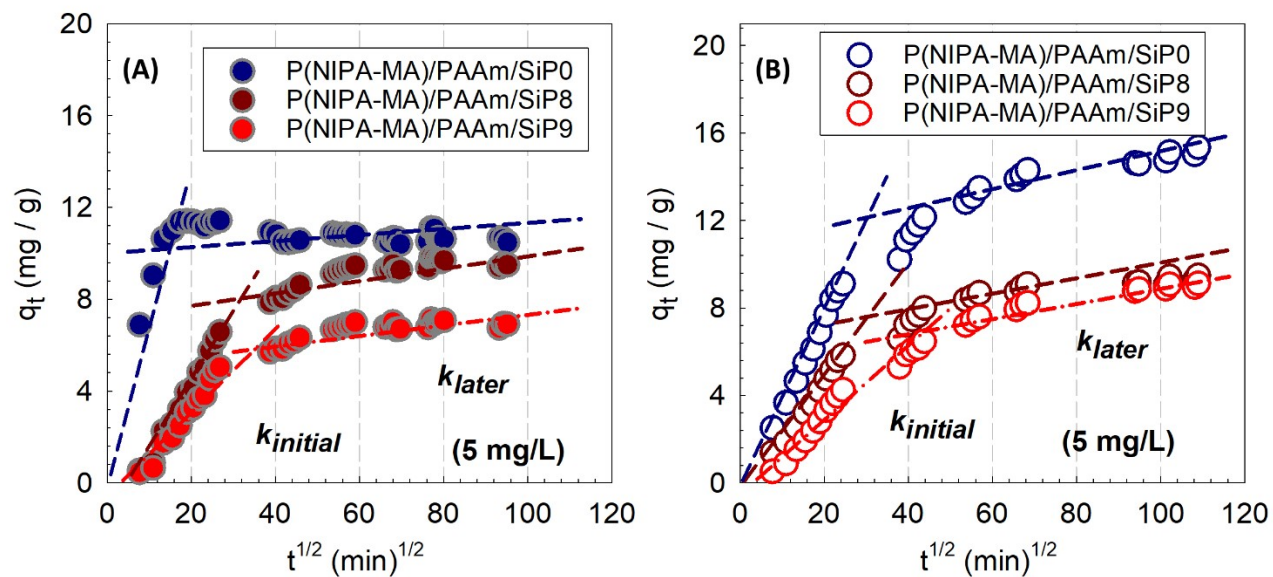

**Figure S8.** Dye adsorption mechanism fitted with intraparticle diffusion model for semi-IPN hybrid P(NIPA-MA)/PAAm/SiP Hgel (A) and Cgel (B). The solid line indicates the model-fit in the experimental data. MV concentration: 5 mg/L.

**Table S2.** Kinetic parameters of pseudo-first-order, pseudo-second-order, Avrami, Elovich, fractional power and intraparticle diffusion models for total MV sorption onto semi-IPN P(NIPA-MA)/PAAm/SiP Cgels. Initial MV concentration: 5 mg L<sup>-1</sup>

| Pseudo-first order model |                                              |                | Elovich model          |                   |                |
|--------------------------|----------------------------------------------|----------------|------------------------|-------------------|----------------|
| Sample                   | $k_1 \times 10^{-3}$<br>(min <sup>-1</sup> ) | R <sup>2</sup> | $\alpha$<br>(mg/g min) | $\beta$<br>(g/mg) | R <sup>2</sup> |
| P(NIPA-MA)/PAAm/SiP0     | 0.502                                        | 0.9485         | 0.084                  | 0.307             | 0.9838         |
| P(NIPA-MA)/PAAm/SiP8     | 0.601                                        | 0.9562         | 0.049                  | 0.474             | 0.9680         |
| P(NIPA-MA)/PAAm/SiP9     | 0.466                                        | 0.9769         | 0.024                  | 0.419             | 0.9815         |

  

| Pseudo-second order model |                                              |                | Weber-Morris model                                         |                |                                                          |                |
|---------------------------|----------------------------------------------|----------------|------------------------------------------------------------|----------------|----------------------------------------------------------|----------------|
| Sample                    | $k_2 \times 10^{-3}$<br>(min <sup>-1</sup> ) | R <sup>2</sup> | $k_{initial}$<br>(mg g <sup>-1</sup> min <sup>-1/2</sup> ) | R <sup>2</sup> | $k_{later}$<br>(mg g <sup>-1</sup> min <sup>-1/2</sup> ) | R <sup>2</sup> |
| P(NIPA-MA)/PAAm/SiP0      | 0.122                                        | 0.9991         | 0.408                                                      | 0.9971         | 0.041                                                    | 0.8888         |
| P(NIPA-MA)/PAAm/SiP8      | 0.220                                        | 0.9994         | 0.282                                                      | 0.9875         | 0.018                                                    | 0.8107         |
| P(NIPA-MA)/PAAm/SiP9      | 0.109                                        | 0.9996         | 0.163                                                      | 0.9506         | 0.034                                                    | 0.8861         |

  

| Fractional power model |                                  |                                    | Avrami model   |          |                                                 |                |
|------------------------|----------------------------------|------------------------------------|----------------|----------|-------------------------------------------------|----------------|
| Sample                 | $v_{fr}$<br>(min <sup>-1</sup> ) | $k_{fr} \times 10^{-2}$<br>(mg /g) | R <sup>2</sup> | $n_{Av}$ | $k_{Av} \times 10^{-3}$<br>(min <sup>-1</sup> ) | R <sup>2</sup> |
| P(NIPA-MA)/PAAm/SiP0   | 0.576                            | 8.041                              | 0.9989         | 0.561    | 0.103                                           | 0.9858         |
| P(NIPA-MA)/PAAm/SiP8   | 0.659                            | 2.439                              | 0.9906         | 0.674    | 0.114                                           | 0.9336         |
| P(NIPA-MA)/PAAm/SiP9   | 0.939                            | 0.821                              | 0.9951         | 0.800    | 0.067                                           | 0.9673         |

**Table S3.** Thermodynamic parameters for adsorption of MV dye and adsorption capacity of P(NIPA-MA)/PAAm/SiP Cgel calculated from various kinetic models. Initial MV concentration: 5 mg L<sup>-1</sup>.

| Sample               | Exp.<br>$q_e$<br>(mg/g) | Pseudo-<br>first<br>order<br>$q_{e,calc}$<br>(mg/g) | Pseudo-<br>second<br>order<br>$q_{e,calc}$<br>(mg/g) | $\Delta G^o$<br>(kJ/mol K) |
|----------------------|-------------------------|-----------------------------------------------------|------------------------------------------------------|----------------------------|
| P(NIPA-MA)/PAAm/SiP0 | 11.150                  | 8.544                                               | 11.901                                               | -2.163                     |
| P(NIPA-MA)/PAAm/SiP8 | 10.488                  | 7.897                                               | 11.005                                               | -1.686                     |
| P(NIPA-MA)/PAAm/SiP9 | 13.390                  | 7.909                                               | 13.584                                               | -3.633                     |

## Stress-strain isotherms of semi-IPN hybrid gels

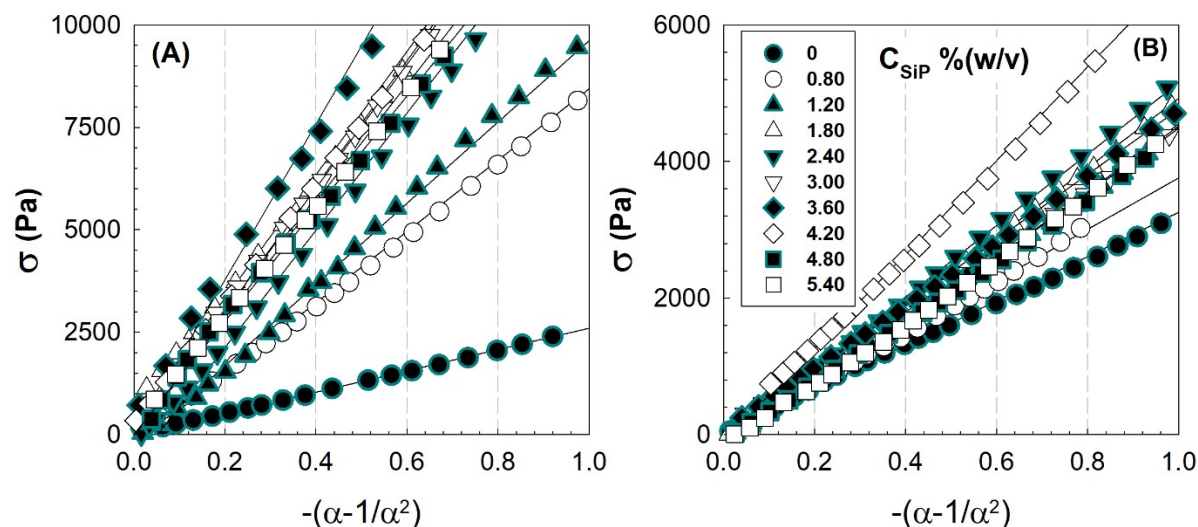

**Figure S9.** Stress-strain isotherms of semi-IPN hybrid P(NIPA-MA)/PAAm/SiP Cgel (A) and Hgel (B) measured after equilibrium swelling in water.

## References

- [1] Hebeish, A., Farag, S., Sharaf, S., & Shaheen, T. I. (2014). Thermal responsive hydrogels based on semi interpenetrating network of poly (NIPAm) and cellulose nanowhiskers. *Carbohydrate polymers*, 102, 159-166.
- [2] Seddiki, N., & Aliouche, D. (2013). Synthesis, rheological behavior and swelling properties of copolymer hydrogels based on poly (N-isopropylacrylamide) with hydrophilic monomers. *Bulletin of the Chemical Society of Ethiopia*, 27(3), 447-457.
- [3] Wei, J., Chen, Y., Liu, H., Du, C., Yu, H., & Zhou, Z. (2016). Thermo-responsive and compression properties of TEMPO-oxidized cellulose nanofiber-modified PNIPAm hydrogels. *Carbohydrate polymers*, 147, 201-207.
- [4] Su, M., Liu, Y., Zhang, Y., Wang, Z., Li, Y., & He, P. (2018). Robust and underwater superoleophobic coating with excellent corrosion and biofouling resistance in harsh environments. *Applied Surface Science*, 436, 152-161.
- [5] Mittal, H., Maity, A., & Ray, S. S. (2015). Synthesis of co-polymer-grafted gum karaya and silica hybrid organic-inorganic hydrogel nanocomposite for the highly effective removal of methylene blue. *Chemical Engineering Journal*, 279, 166-179.
- [6] Agorku, E. S., Mittal, H., Mamba, B. B., Pandey, A. C., & Mishra, A. K. (2014). Fabrication of photocatalyst based on Eu<sup>3+</sup>-doped ZnS-SiO<sub>2</sub> and sodium alginate core shell nanocomposite. *International journal of biological macromolecules*, 70, 143-149.
- [7] Sun, L., Zhang, X., Zheng, C., Wu, Z., & Li, C. (2013). A pH Gated, Glucose-Sensitive Nanoparticle Based on Worm-Like Mesoporous Silica for Controlled Insulin Release. *The Journal of Physical Chemistry B*, 117(14), 3852-3860.

- [8] Kang, X., Cheng, Z., Yang, D., Ma, P. A., Shang, M., Peng, C., ... & Lin, J. (2012). Design and synthesis of multifunctional drug carriers based on luminescent rattle-type mesoporous silica microspheres with a thermosensitive hydrogel as a controlled switch. *Advanced Functional Materials*, 22(7), 1470-1481.
- [9] Zhang, X., Wu, B., Sun, S., & Wu, P. (2020). Hybrid Materials from Ultrahigh-Inorganic-Content Mineral Plastic Hydrogels: Arbitrarily Shapeable, Strong, and Tough. *Advanced functional materials*, 30(19), 1910425.
- [10] Wei, J., Chen, Y., Liu, H., Du, C., Yu, H., & Zhou, Z. (2016). Thermo-responsive and compression properties of TEMPO-oxidized cellulose nanofiber-modified PNIPAm hydrogels. *Carbohydrate polymers*, 147, 201-207.
- [11] Li, G., Yu, N., Gao, Y., Tao, Q., & Liu, X. (2016). Polymeric hollow spheres assembled from ALG-g-PNIPAM and  $\beta$ -cyclodextrin for controlled drug release. *International journal of biological macromolecules*, 82, 381-386.
